# Supplementary material
Source: Royal Society of Chemistry journal article supplement (doi:10.1039/d6nj01477a)
Supplement: d6nj01477a1.pdf [file d6nj01477a1.pdf]

## ELECTRONIC SUPPLEMENTARY INFORMATION

**Highly active Ni–Fe/ $\beta$ -Mo<sub>2</sub>C and Ni–Co/ $\beta$ -Mo<sub>2</sub>C catalysts derived from hydrotalcites via nitrogen atmosphere: Promising noble-metal-free catalysts for nitroarene and biomass derived molecule hydrogenation**

**T. V. Vrinda,<sup>a</sup> M. G. Gopika,<sup>a</sup> P. Aswin,<sup>a</sup> B. N. Soumya,<sup>a</sup> A. Nikita,<sup>a</sup> N. J. Venkatesha,<sup>b</sup> V. Ganesh,<sup>c</sup> A. Sakthivel<sup>a\*</sup>**

<sup>a</sup>Inorganic Materials & Heterogeneous Catalysis Laboratory, Department of Chemistry, School of Physical Sciences, Sabarmati Building, Tejaswini Hills, Central University of Kerala, Kasaragod - 671320, India.

<sup>b</sup>Department of Chemistry, Bangalore Institute of Technology, Bangalore, 560004, India

<sup>c</sup>Electrodics and Electrocatalysis (EEC) Division, CSIR-Central Electrochemical Research Institute (CSIR-CECRI), Karaikudi, Tamil Nadu, India

\*Email: [sakthivelcuk@cukerala.ac.in](mailto:sakthivelcuk@cukerala.ac.in)

ORCID information: <https://orcid.org/0000-0003-2330-5192>

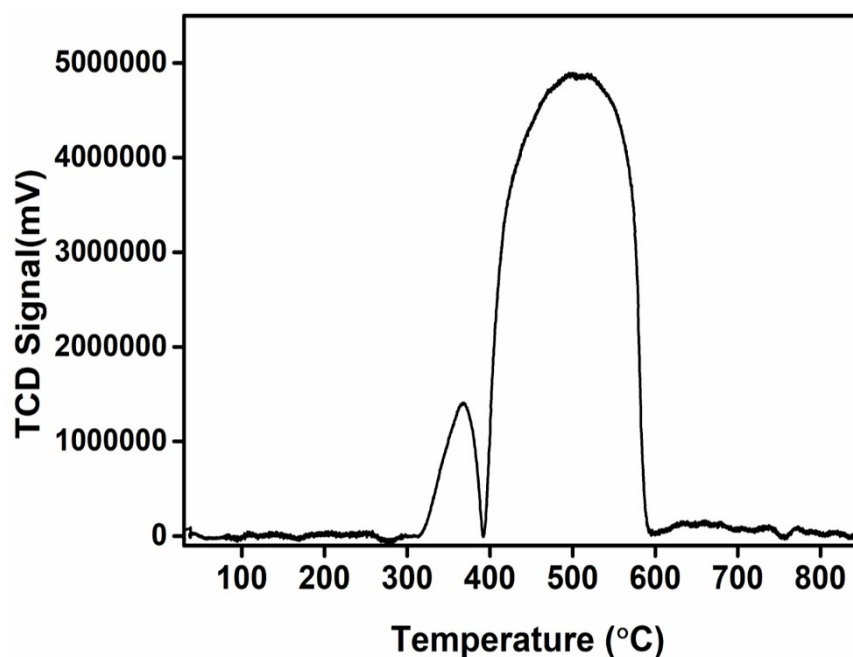

Fig. S1 H<sub>2</sub>-TPR profile of Co(OH)<sub>2</sub> precursor

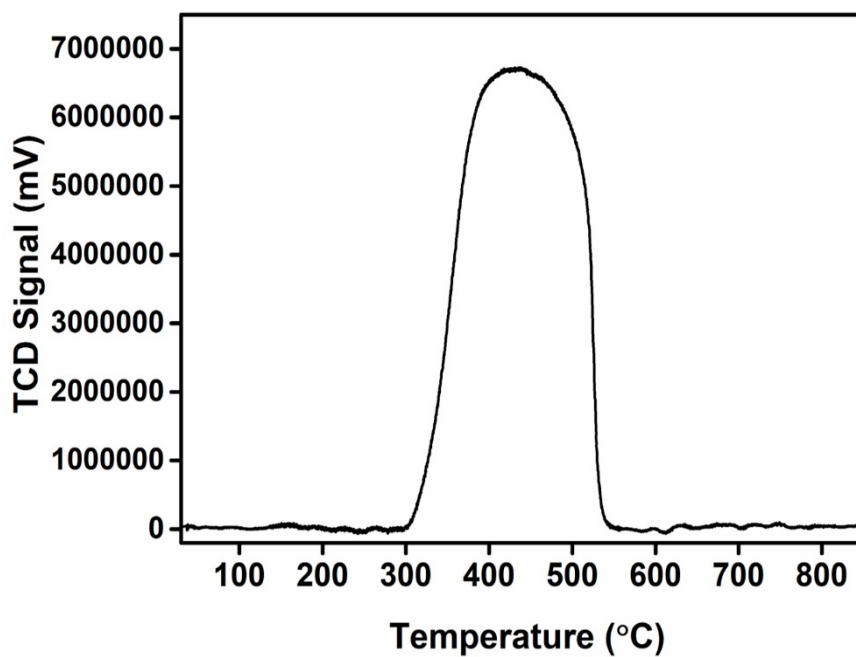

Fig. S2 H<sub>2</sub>-TPR profile of Ni(OH)<sub>2</sub> precursor

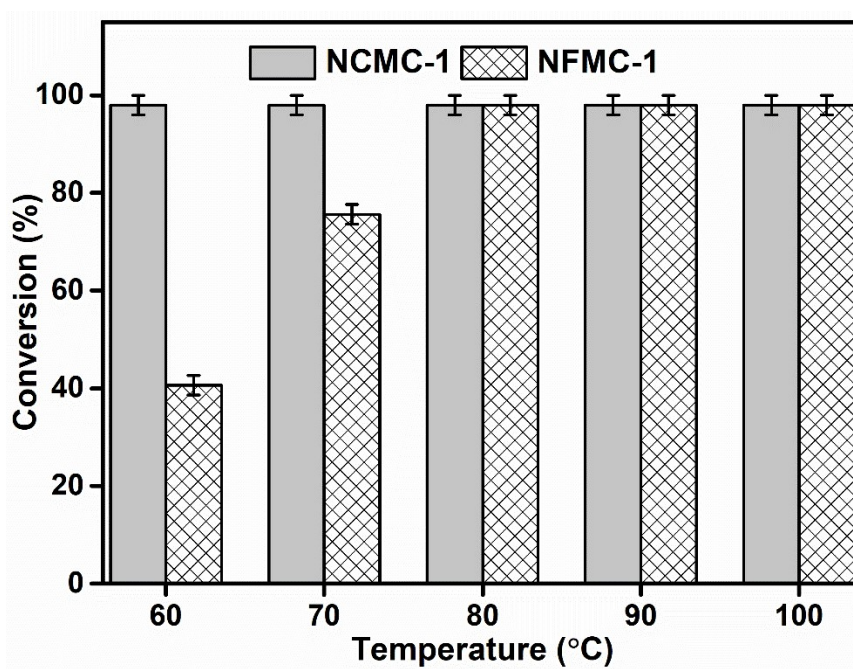

Fig. S3 Effect of reaction temperature on the conversion of nitrobenzene over NFMC-1 and NCMC-1 catalysts.

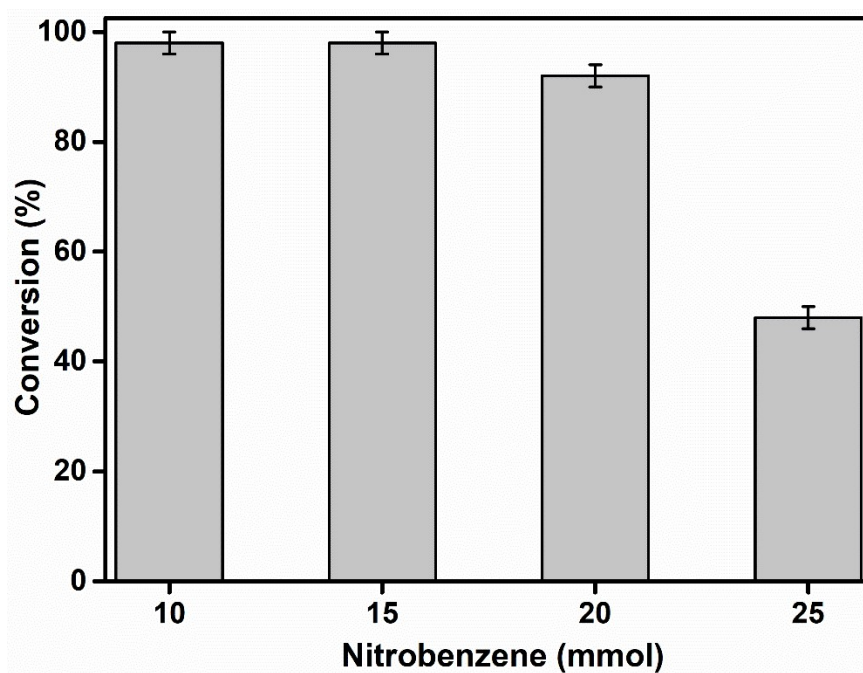

**Fig. S4** Effect of Increasing Nitrobenzene and Hydrazine-Hydrate Loading (with fixed 1:2 Ratio) on Catalytic Conversion over NCMC-1

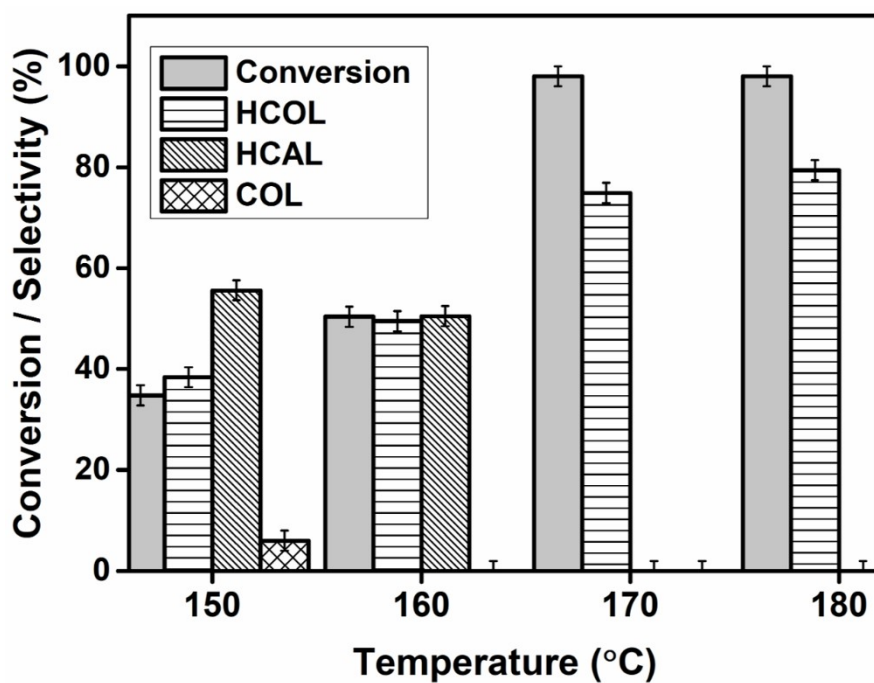

**Fig. S5** Effect of temperature on conversion and selectivity toward HCOL (hydrocinnamyl alcohol), HCAL (hydrocinnamaldehyde) and COL (cinnamyl alcohol) in cinnamaldehyde hydrogenation.

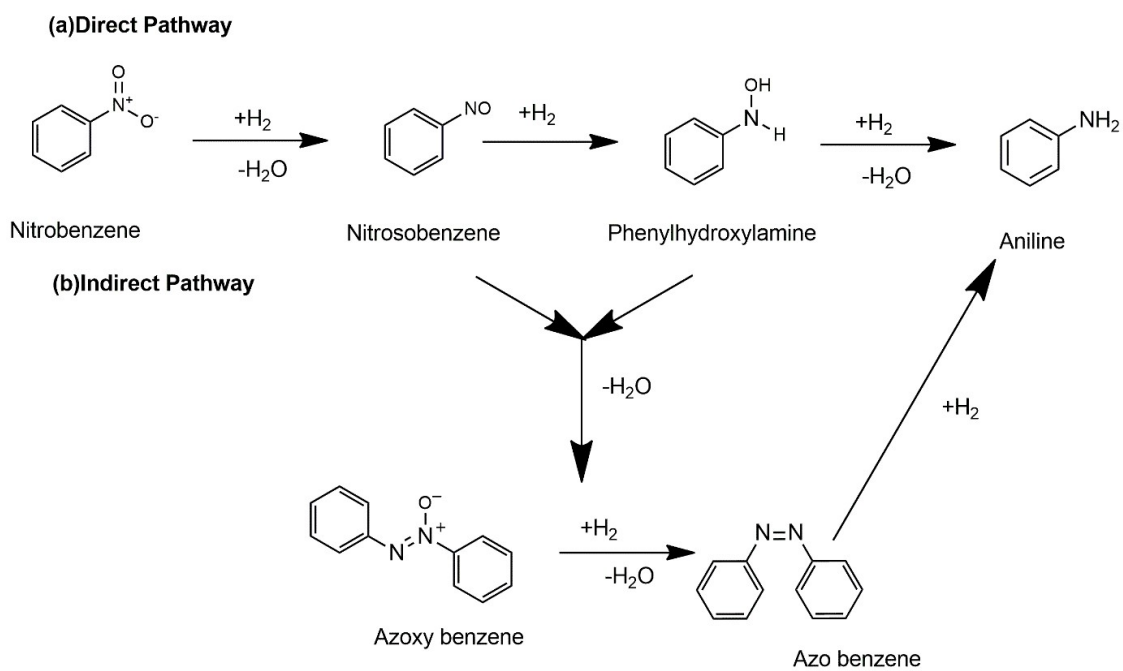

**Scheme S1.** Literature-reported reaction pathways for nitrobenzene hydrogenation.<sup>1</sup>

## References

1. A. Mahata, R. K. Rai, I. Choudhuri, S. K. Singha and B. Pathak, *Phys. Chem. Chem. Phys.*, 2014, **16**, 26365
